# Supplementary material for: Silencing Osteopontin Expression Inhibits Proliferation, Invasion and Induce Altered Protein Expression in Melanoma Cells
Source: PubMed Central journal article supplement (PMC8262222; doi:10.3389/pore.2021.581395), 2021-03-05
Supplement: TableS1.pdf [file TableS1.pdf]

**Supplementary Table 1. Clinical–pathological data of primary and metastatic melanoma tissue samples used in qRT-PCR analysis**

| Sample number            | Sex | Age at initial diagnosis (year) | Histological subtype | Breslow thickness (mm) | Clark stage | TNM status |
|--------------------------|-----|---------------------------------|----------------------|------------------------|-------------|------------|
| Primary melanoma samples |     |                                 |                      |                        |             |            |
| P04                      | F   | 40                              | SSM                  | 7.00                   | IV          | T4bN0M0    |
| P05                      | M   | 52                              | SSM                  | 3.20                   | IV          | T3bN0M0    |
| P06                      | M   | 74                              | SSM                  | 5.00                   | III-IV      | T4bN0M0    |
| P08                      | M   | 41                              | SSM                  | 14.0                   | V           | T4b2bM3    |
| P09                      | F   | 54                              | SSM                  | 11.0                   | n.d.        | T4N2       |
| P10                      | M   | 71                              | SSM                  | 0.15                   | III         | T1aNxMx    |
| P12                      | M   | 68                              | SSM                  | 3.50                   | III-IV      | T3bN0M0    |
| P13                      | M   | 51                              | SSM                  | 2.42                   | III         | T3aNxMx    |
| P14                      | F   | 62                              | SSM                  | 0.57                   | III         | T1aN0M0    |
| P15                      | M   | 53                              | SSM                  | 0.72                   | III         | T1aN0M0    |
| P16                      | F   | 72                              | SSM                  | 0.24                   | III         | T1aN0M0    |
| P18                      | M   | 51                              | SSM                  | 1.33                   | III         | T2aN0M0    |
| P19                      | F   | 54                              | SSM                  | 0.65                   | III         | T1aN0M0    |
| P23                      | F   | 70                              | SSM                  | 0.36                   | III         | T1aN0M0    |
| P24                      | F   | 70                              | SSM                  | 0.24                   | III         | T1aN0M0    |
| P25                      | F   | 44                              | SSM                  | 0.24                   | III         | T1aN0M0    |
| P26                      | M   | 47                              | SSM                  | 3.14                   | III         | T3aN0M0    |
| P29                      | F   | 68                              | SSM                  | 1.05                   | IV          | T2aN0      |
| P30                      | M   | 64                              | SSM                  | 0.30                   | II          | T1aN0      |
| P31                      | F   | 75                              | SSM                  | 3.00                   | IV          | T3bN0      |
| P32                      | M   | 73                              | SSM                  | 2.80                   | IV          | T2aNx      |
| P34                      | M   | 51                              | SSM                  | 3.20                   | IV          | pT3a       |
| P35                      | F   | 86                              | SSM                  | 2.40                   | IV          | pT3bN0     |
| P36                      | F   | 72                              | SSM                  | 2.40                   | IV          | pT3a       |
| P01                      | F   | 71                              | NM                   | 7.00                   | IV          | T4bN0M0    |
| P02                      | M   | 38                              | NM                   | 12.00                  | IV          | T4bN0M0    |
| P03                      | F   | 77                              | NM                   | 12.00                  | V           | T4bN3M0    |
| P07                      | M   | 44                              | NM                   | 25.00                  | V           | T4bN0M0    |
| P11                      | M   | 63                              | NM                   | 8.00                   | V           | T4bN0M0    |
| P17                      | F   | 61                              | NM                   | 2.64                   | III         | T3aN0M0    |
| P22                      | F   | 44                              | NM                   | 3.72                   | III         | T3aN0M0    |
| P27                      | M   | 72                              | NM                   | 3.60                   | III         | T3bNxMx    |
| P28                      | F   | 83                              | NM                   | 3.50                   | IV          | T3b        |
| P33                      | M   | 77                              | NM                   | 2.20                   | IV          | pT3bN0     |

| Sample number       | Sex  | Age at initial diagnosis (year) | Localization of metastasis |
|---------------------|------|---------------------------------|----------------------------|
| Melanoma metastasis |      |                                 |                            |
| M01                 | M    | n.d.                            | Distant                    |
| M02                 | n.d. | n.d.                            | Distant                    |
| M03                 | M    | 81                              | rSC/C                      |
| M04                 | M    | 75                              | rLN                        |
| M05                 | F    | 74                              | rSC/C                      |
| M06                 | F    | 30                              | rLN                        |
| M07                 | M    | 72                              | rLN                        |
| M08                 | n.d. | n.d.                            | Distant                    |
| M09                 | M    | 65                              | rLN                        |
| M10                 | M    | 52                              | rSC/C                      |
| M11                 | M    | 70                              | rSC/C                      |
| M12                 | M    | 81                              | Distant                    |

F: female; M: male; n.d.: no data available; SSM: superficial spreading melanoma; NM: nodular melanoma; rLN: regional lymph node; rSC/C: regional (sub)cutaneous.
