# Supplementary material for: Silencing Osteopontin Expression Inhibits Proliferation, Invasion and Induce Altered Protein Expression in Melanoma Cells
Source: PubMed Central journal article supplement (PMC8262222; doi:10.3389/pore.2021.581395), 2021-03-05
Supplement: TableS2.pdf [file TableS2.pdf]

**Supplementary Table 2. Relative protein expression of 84 cancer-related proteins in melanoma cell lines**

| Sl. No. | Positions of the Proteins on the Array | Proteins Name                             | WM278 | WM278 OPN-siRNA | WM1617 | WM1617 OPN-siRNA |
|---------|----------------------------------------|-------------------------------------------|-------|-----------------|--------|------------------|
|         | A1/A2                                  | <b>Reference spots</b>                    | 100   | 100             | 100    | 100              |
| 1       | A3/A4                                  | <b><math>\alpha</math>-Fetoprotein</b>    | 0     | 0               | 8.70   | 15.86            |
| 2       | A5/A6                                  | <b>Amphiregulin</b>                       | 0     | 0               | 0      | 4.18             |
| 3       | A7/A8                                  | <b>Angiopoietin-1</b>                     | 9.98  | 0               | 0      | 4.07             |
| 4       | A9/A10                                 | <b>Angiopoietin-like 4</b>                | 0     | 0               | 8.20   | 17.06            |
| 5       | A11/A12                                | <b>ENPP-2/Autotaxin</b>                   | 0     | 0               | 5.14   | 18.91            |
| 6       | A13/A14                                | <b>Axl</b>                                | 21.18 | 0               | 0      | 0                |
| 7       | A15/A16                                | <b>BCL-x</b>                              | 0     | 0               | 6.21   | 0                |
| 8       | A17/A18                                | <b>CA125/MUC16</b>                        | 0     | 0               | 0      | 0                |
| 9       | A19/A20                                | <b>E-Cadherin</b>                         | 0     | 0               | 0      | 0                |
| 10      | A21/A22                                | <b>VE-Cadherin</b>                        | 0     | 0               | 18.57  | 10.46            |
| 11      | B3/B4                                  | <b>CapG</b>                               | 0     | 0               | 56.15  | 43.29            |
| 12      | B5/B6                                  | <b>Carbonic Anhydrase IX</b>              | 0     | 0               | 11.97  | 10.52            |
| 13      | B7/B8                                  | <b>Cathepsin B</b>                        | 9.76  | 0               | 25.34  | 18.23            |
| 14      | B9/B10                                 | <b>Cathepsin D</b>                        | 11.03 | 0               | 21.97  | 27.24            |
| 15      | B11/B12                                | <b>Cathepsin S</b>                        | 40.39 | 27.27           | 9.4    | 14.65            |
| 16      | B13/B14                                | <b>CEACAM-5</b>                           | 0     | 0               | 0      | 6.1              |
| 17      | B15/B16                                | <b>Decorin</b>                            | 0     | 0               | 0      | 5.24             |
| 18      | B17/B18                                | <b>Dkk-1</b>                              | 0     | 0               | 0      | 0                |
| 19      | B19/B20                                | <b>DLL1</b>                               | 0     | 0               | 4.83   | 9.58             |
| 20      | B21/B22                                | <b>EGFR/ErbB1</b>                         | 32.34 | 14.19           | 25.8   | 12.42            |
| 21      | C3/C4                                  | <b>Endoglin/CD105</b>                     | 22.89 | 23.22           | 33.53  | 45.6             |
| 22      | C5/C6                                  | <b>Endostatin</b>                         | 0     | 0               | 0      | 0                |
| 23      | C7/C8                                  | <b>Enolase 2</b>                          | 75.83 | 31.06           | 67.93  | 96.61            |
| 24      | C9/C10                                 | <b>eNOS</b>                               | 0     | 0               | 0      | 4.37             |
| 25      | C11/C12                                | <b>EpCAM/TROP1</b>                        | 0     | 0               | 0      | 3.12             |
| 26      | C13/C14                                | <b>ER<math>\alpha</math>/NR3A1</b>        | 0     | 0               | 0      | 0                |
| 27      | C15/C16                                | <b>ErbB2</b>                              | 12.12 | 0               | 4.36   | 14.4             |
| 28      | C17/C18                                | <b>ErbB3/Her3</b>                         | 10.06 | 0               | 9.82   | 11.01            |
| 29      | C19/C20                                | <b>ErbB4</b>                              | 0     | 0               | 0      | 4.96             |
| 30      | C21/C22                                | <b>FGF basic</b>                          | 33.02 | 6.36            | 8.89   | 13.77            |
| 31      | D1/D2                                  | <b>FoxC2</b>                              | 0     | 0               | 0      | 0                |
| 32      | D3/D4                                  | <b>FoxO1/FKHR</b>                         | 0     | 0               | 43.33  | 30.05            |
| 33      | D5/D6                                  | <b>Galectin-3</b>                         | 63.83 | 12.9            | 82.67  | 88.84            |
| 34      | D7/D8                                  | <b>GM-CSF</b>                             | 0     | 0               | 0      | 3.55             |
| 35      | D9/D10                                 | <b>CG <math>\alpha/\beta</math> (HCG)</b> | 0     | 0               | 13     | 8.8              |
| 36      | D11/D12                                | <b>HGF R/c-Met</b>                        | 0     | 0               | 0      | 0                |
| 37      | D13/D14                                | <b>HIF-1<math>\alpha</math></b>           | 4.20  | 0               | 59.92  | 56.06            |
| 38      | D15/D16                                | <b>HNF-3<math>\beta</math></b>            |       | 0               | 0      | 4.63             |
| 39      | D17/D18                                | <b>HO-1/HMOX1</b>                         | 9.15  | 5.51            | 45.2   | 47.36            |
| 40      | D19/D20                                | <b>ICAM-1/CD54</b>                        | 14.56 | 4.89            | 38.85  | 37.7             |
| 41      | D21/D22                                | <b>IL-2 R<math>\alpha</math></b>          | 0     | 0               | 0      | 0                |
| 42      | D23/D24                                | <b>IL-6</b>                               | 0     | 3.62            | 0      | 8.23             |
| 43      | E1/E2                                  | <b>CXCL8/IL-8</b>                         | 34.09 | 46.58           | 0      | 0                |
| 44      | E3/E4                                  | <b>IL-18 BPa</b>                          | 0     | 0               | 0      | 4.18             |
| 45      | E5/E6                                  | <b>Kallikrein 3/PSA</b>                   | 0     | 0               | 0      | 4.81             |
| 46      | E7/E8                                  | <b>Kallikrein 5</b>                       | 0     | 0               | 0      | 0                |
| 47      | E9/E10                                 | <b>Kallikrien 6</b>                       | 0     | 0               | 0      | 0                |
| 48      | E11/E12                                | <b>Leptin</b>                             | 0     | 0               | 0      | 0                |
| 49      | E13/E14                                | <b>Lumican</b>                            | 0     | 0               | 0      | 0                |

| Sl. No. | Positions of the Proteins on the Array | Proteins Name                     | WM278 | WM278 OPN-siRNA | WM1617 | WM1617 OPN-siRNA |
|---------|----------------------------------------|-----------------------------------|-------|-----------------|--------|------------------|
| 50      | E15/E16                                | CCL2/MCP-1                        | 96.97 | 14.32           | 0      | 0                |
| 51      | E17/E18                                | CCL8/MCP-2                        | 0     | 0               | 0      | 5.03             |
| 52      | E19/E20                                | CCL7/MCP-3                        | 0     | 0               | 0      | 0                |
| 53      | E21/E22                                | M-CSF                             | 0     | 0               | 0      | 11.83            |
| 54      | E23/E24                                | Mesothelin                        | 0     | 0               | 0      | 9.56             |
| 55      | F1/F2                                  | CCL3/MIP-1 $\alpha$               | 0     | 0               | 0      | 0                |
| 56      | F3/F4                                  | CCL20/MIP-3 $\alpha$              | 0     | 0               | 0      | 3.63             |
| 57      | F5/F6                                  | MMP-2                             | 0     | 0               | 0      | 3.77             |
| 58      | F7/F8                                  | MMP-3                             | 0     | 5.13            | 0      | 10.13            |
| 59      | F9/F10                                 | MMP-9                             | 0     | 0               | 0      | 0                |
| 60      | F11/F12                                | MSP/MST1                          | 0     | 0               | 0      | 4.06             |
| 61      | F13/F14                                | MUC-1                             | 0     | 0               | 0      | 4.26             |
| 62      | F15/F16                                | Nectin-4                          | 0     | 0               | 0      | 4.07             |
| 63      | F17/F18                                | Osteopontin (OPN)                 | 78.09 | 41.58           | 48.9   | 30.72            |
| 64      | F19/F20                                | p27/Kip1                          | 0     | 0               | 22.07  | 12.24            |
| 65      | F21/F22                                | p53                               | 15.15 | 10.87           | 89.85  | 57.03            |
| 66      | F23/F24                                | PDGF-AA                           | 12.67 | 0               | 0      | 6.78             |
| 67      | G1/G2                                  | CD31/PECAM-1                      | 0     | 0               | 0      | 0                |
| 68      | G3/G4                                  | Progesterone R/NR3C3              | 0     | 0               | 0      | 0                |
| 69      | G5/G6                                  | Progranulin                       | 23.81 | 11.17           | 44.49  | 34.95            |
| 70      | G7/G8                                  | Prolactin                         | 0     | 0               | 0      | 7.37             |
| 71      | G9/G10                                 | Prostasin/Prss8                   | 0     | 0               | 0      | 0                |
| 72      | G11/G12                                | E-Selectin/CD62E                  | 0     | 0               | 0      | 0                |
| 73      | G13/G14                                | Serpin B5/Maspin                  | 0     | 0               | 0      | 0                |
| 74      | G15/G16                                | Serpin E1/PAI-1                   | 0     | 0               | 0      | 5.94             |
| 75      | G17/G18                                | Snail                             | 27.51 | 16.16           | 37.31  | 33.77            |
| 76      | G19/G20                                | SPARC                             | 15.04 | 7.98            | 41.63  | 31.95            |
| 77      | G21/G22                                | Survivin                          | 33.94 | 0               | 90.78  | 49.76            |
| 78      | G23/G24                                | Tenascin C                        | 47.84 | 32.16           | 66.78  | 21.15            |
| 79      | H1/H2                                  | Thrombospondin-1                  | 0     | 0               | 0      | 0                |
| 80      | H3/H4                                  | Tie-2                             | 0     | 0               | 0      | 5.18             |
| 81      | H5/H6                                  | u-Plasminogen Activator/Urokinase | 0     | 0               | 0      | 4.4              |
| 82      | H7/H8                                  | VCAM-1/CD106                      | 0     | 0               | 0      | 3.7              |
| 83      | H9/H10                                 | VEGF                              | 0     | 0               | 0      | 2.77             |
| 84      | H11/H12                                | Vimentin                          | 16.77 | 25.68           | 31.25  | 31.06            |
